# Supplementary material
Source: Springer Nature journal article supplement (https://www.springermedizin.de/resource/supplementary/12875_2010_520_MOESM1_ESM.pdf/9434784)
Supplement: MOESM1 [file 9434784]

3089 eligible patients

1751 excluded:  
Understanding Dutch language (N=75)  
Dementia (N=5)  
Psychosis (N=2)  
Mental retardation (N=1)  
Refused (N=1668)

1338 participants
